1 **Longitudinal Changes in Lifestyle Behaviors and Cardiovascular**  
2 **Health During the Transition to Fatherhood: The Dad Bod Study**  
3 **Rationale and Design**

4  
5 Matthew J. Landry, PhD, RDN<sup>1</sup>; Jocelyn P. Pineda, BS<sup>1</sup>; Jaylen M. Lee, PhD<sup>2</sup>; Michael  
6 A. Hoyt, PhD<sup>1</sup>; Karen L. Edwards, PhD, MS<sup>1,3</sup>; Karen L. Lindsay, PhD, RDN<sup>4,5</sup>;  
7 Christopher D. Gardner, PhD<sup>6</sup>, Nathan D. Wong, PhD, MPH<sup>7</sup>

- 8  
9 1. Department of Population Health and Disease Prevention, Joe C. Wen School of  
10 Population & Public Health, University of California, Irvine; Irvine, California, USA  
11 2. Biostatistics, Epidemiology & Research Design Unit, Institute for Clinical and  
12 Translational Sciences, University of California, Irvine; Irvine, California, USA  
13 3. Department of Epidemiology & Biostatistics, Joe C. Wen School of Population &  
14 Public Health, University of California, Irvine; Irvine, California, USA  
15 4. Department of Pediatrics, School of Medicine, University of California, Irvine; Irvine,  
16 California, USA  
17 5. Susan Samueli Integrative Health Institute, Susan and Henry Samueli College of  
18 Health Sciences, University of California, Irvine; Irvine, California, USA  
19 6. Stanford Prevention Research Center, School of Medicine, Stanford University; Palo  
20 Alto, California, USA  
21 7. Heart Disease Prevention Program, Mary and Steve Wen Cardiovascular Division,  
22 School of Medicine, University of California, Irvine; Irvine, California, USA

23  
24 **Corresponding Author**

25 Matthew Landry  
26 856 Health Sciences Rd., Office 3539  
27 Irvine, CA 92697  
28 [landrymj@hs.uci.edu](mailto:landrymj@hs.uci.edu)

29  
30 **Short Title**

31 Fatherhood's Impact on Cardiovascular Health

32  
33 **Total Word Count**

34 3481

35 **Abstract**

36 *Background.* Despite the importance of the transition to fatherhood as a critical life  
37 stage among young adult men, much remains unknown about the factors predictive of  
38 ideal cardiovascular health (CVH) and how CVH is impacted as young men face new  
39 roles and responsibilities associated with fatherhood.

40

41 *Methods.* To address this gap, the Dad Bod Study is a prospective, longitudinal and  
42 observational study designed to examine how fatherhood affects young men's CVH. A  
43 total of 125, first-time prospective fathers (men, 19-39 years) will be enrolled and  
44 followed over 1.5 years. Metrics of the American Heart Association's "Life's Essential 8"  
45 as well as demographic, social, and psychosocial factors will be collected at four time  
46 points ((baseline (during the pregnant partner's 2nd trimester) 1-month postpartum, 6-  
47 months postpartum, and 1-year postpartum). The primary aims are to measure  
48 predictors of CVH among first-time fathers and describe longitudinal changes in CVH. A  
49 secondary aim is to identify best practices for recruitment, retention, and remote data  
50 collection in this population.

51

52 *Summary.* The Dad Bod Study offers a novel examination of CVH among first-time  
53 fathers, exploring how new paternal roles and responsibilities impact cardiovascular  
54 health. Findings may provide key insights into critical CVH behaviors and risk factors to  
55 monitor, preserve, and improve as young men transition to fatherhood.

56

57 **Keywords:** men's health; cardiovascular health; paternal; fatherhood

58 **Non-Standard Abbreviation and Acronyms**

59 CE Studio, Community Engagement Studio

60 CVD, Cardiovascular Disease

61 CVH, Cardiovascular Health

62 SHAP, Shapley Additive exPlanations

## 63 Introduction

64 Cardiovascular disease (CVD) is a leading cause of death among men in the United  
65 States, despite >80% of all cardiovascular events being preventable through healthy  
66 lifestyles and management of known CVD risk factors<sup>1,2</sup>. Maintaining health promoting  
67 behaviors and avoiding the development of adverse risk behaviors earlier in life  
68 (primordial prevention) can improve cardiovascular health (CVH) and reduce the future  
69 burden of CVD<sup>3-5</sup>.

70

71 Young adulthood encompasses an age range between 18 and 39 years old<sup>6</sup>. During this  
72 life stage many critical decisions and goal pursuits occur that can have enduring  
73 ramifications – young adults often complete their education, enter the workforce,  
74 establish social networks and romantic relationships, and potentially start a family.  
75 Recent trends indicate a steady or slightly increasing incidence of CVD in young adults  
76 contrasting with the generally decreasing rates observed in middle-aged and older  
77 adults<sup>2,7</sup>. Exacerbating this trend, recent nationally representative data have shown that  
78 CVH in young adults has not improved in the last decade<sup>8</sup>. These findings portend a  
79 potential future burden of CVD and reversal of decreasing rates of CVD in later  
80 developmental periods as current young adults age.

81

82 The transition to fatherhood among young men represents a major, discrete life event in  
83 which substantial biological, psychological, and social changes can occur<sup>9-11</sup> (**Figure**  
84 **1**). Some men may be motivated to improve their health during the transition to  
85 fatherhood, while others are challenged to improve or maintain health as they

86 experience disruption to their lifestyle routines<sup>10-12</sup>. A new father's ability to choose a  
87 healthy lifestyle may also be influenced by social or socioeconomic and structural  
88 elements<sup>13-15</sup>. Further, the transition to fatherhood can significantly impact men's health,  
89 as the stress and anxiety associated with new parental responsibilities may exacerbate  
90 or trigger various physical and mental health issues, including depression, which has  
91 been well documented among men during the perinatal and postpartum period<sup>16,17</sup>.

92

93 As men transition into fatherhood and throughout the postpartum period, several  
94 undesirable CVH behaviors have been observed. These include declines in physical  
95 activity and increased sedentary behavior<sup>18,19</sup>, reduced sleep<sup>20-22</sup>, poor diet quality<sup>20,23</sup>,  
96 and increases in body weight<sup>19,20,22,24-27</sup>. However, the impact of fatherhood on health  
97 behaviors is not uniformly negative. Some studies have also noted positive associations  
98 such as greater physical activity<sup>20</sup> and lower rates of smoking<sup>19</sup> among new fathers.  
99 Evidence also suggests that the relationship of fatherhood with CVH may also differ by  
100 age in which men enter into fatherhood and by race/ethnicity<sup>28</sup>. Despite the importance  
101 of the transition to fatherhood as a critical life stage among young men, much remains  
102 unknown about the factors predictive of ideal CVH and how CVH is impacted as young  
103 men face new roles and responsibilities associated with fatherhood.

104

105 The current study, titled 'The Dad Bod Study' was designed as a prospective,  
106 longitudinal and observational study designed to examine how fatherhood affects young  
107 men's CVH. Specifically, the study aims to (1) examine demographic, social, and  
108 psychosocial factors that are predictive of CVH among first-time fathers, (2) examine

109 longitudinal changes to CVH in first-time fathers using the American Heart Association’s  
110 “Life’s Essential 8” metric and (3) identify best practices for recruitment, retention, and  
111 remote data collection among first-time fathers. This article describes the design,  
112 methodology, and rationale for the Dad Bod Study.

113

## 114 **Methods**

### 115 *Ethics Statement and Data Availability*

116 The study was approved by the University of California, Irvine Institutional Review  
117 Board (IRB #4907, approved May 1, 2024). After study completion, the anonymized  
118 data and material will be made publicly available.

119

### 120 *Community Engagement Studios*

121 In the Spring of 2024, our research team conducted a series of Community  
122 Engagement Studios (CE Studios) in partnership with the Institute for Clinical and  
123 Translational Science at the University of California, Irvine. CE Studios are a  
124 consultative model meant to provide research teams with rapid feedback from  
125 individuals representative of the population of interest on specific aspects of their  
126 existing study design before a research project is implemented<sup>29,30</sup>. During each CE  
127 Studio, we presented a brief overview of the research project then provided prompts  
128 regarding aspects of this project. CE Studio participants participated in a facilitated  
129 discussion and provided their opinions and recommendations. Each CE Studios  
130 focused on a different aspect of the project allowing us to gain relevant insights on  
131 recruitment methods, number of timepoints and perceptions on participant burden, data

132 collection methods, and strategies for participant retention. Insights gathered from the  
133 CE Studios were used by the research team to refine and strengthen the  
134 methodological approach of this study described in subsequent sections.

135

### 136 *Participant Recruitment*

137 When designing the study, the research team carefully considered known barriers and  
138 facilitators for recruiting and retaining male participants in longitudinal health research  
139 <sup>31</sup>. Recruitment for the study is expected to begin in Fall 2024. We will recruit 125 young  
140 adult (age 19-39), male individuals. Participants will be recruited from across the United  
141 States during their pregnant partner's 2<sup>nd</sup> trimester and will be allowed to enroll in the  
142 study up until the pregnant partner's 35<sup>th</sup> week of pregnancy during the 3<sup>rd</sup> trimester.  
143 First-time fathers are defined as a biological father who has not yet experienced the live  
144 birth of his own child<sup>32</sup>.

145

146 Multiple methods of participant recruitment will be used. Participants will be recruited  
147 using Native Health Research<sup>33</sup>, a participant recruitment platform that uses social  
148 media and digital advertisements to connect interested participants with research  
149 studies. Recruitment will also take place through online support groups for prospective  
150 fathers. Printed advertisements will be displayed on notice boards at various community  
151 venues in Orange County, CA, including workplaces, community group meeting  
152 locations, sports complexes, golf clubs, and local library branches. Additionally, local  
153 obstetrician-gynecologists within the university and local hospital systems will be  
154 informed about the study and provided with flyers to distribute during prenatal care

155 visits. Interested men will complete a brief online screener, via URL link or QR code on  
156 study advertisements, to determine eligibility. As part of the screener, participants will be  
157 asked to indicate how they heard about the study during the initial enrollment process,  
158 allowing us to track and analyze the effectiveness of various recruitment methods.

159

### 160 *Inclusion and Exclusion Criteria*

161 Inclusion and exclusion criteria are intended to maximize both eligibility and  
162 generalizability (**Table 1**). We will recruit only males, as the study aims seek to answer  
163 the question of how fatherhood affects men's health. Additionally, we will exclude men  
164 aged  $\geq 40$ , given our focus on management of lifestyle behaviors and cardiovascular risk  
165 factors before onset of cardiovascular disease. There will be no exclusion based on  
166 racial or ethnic status. Due to budget limitations, study materials will be provided only in  
167 English. Additionally, recognizing the diverse nature of modern families, the study  
168 adopts an inclusive approach with no eligibility restrictions on fathers' living  
169 arrangements or planned involvement in infant care. However, this information will be  
170 collected for analytical purposes.

171

### 172 *Data Collection*

173 Eligible participants will attend a study orientation session, conducted via video call.  
174 After being informed about the study design interested participants will provide written  
175 informed consent. Enrolled men will complete four longitudinal assessments (baseline  
176 (during the pregnant partner's 2<sup>nd</sup> trimester) 1-month postpartum, 6-months postpartum,  
177 and 1-year postpartum) over the course of the study. The baseline data collection



178 timepoint will occur immediately after consenting to participate in the study. Time points  
179 were chosen based on feedback gathered in CE Studios and to be frequent enough to  
180 allow for comprehensive assessment of trends in CVH without being onerous on  
181 participants.

182 Given a general disengagement with traditional preventive care among young men<sup>34,35</sup>,  
183 this study utilizes novel approaches to recruit, retain, and collect all data remotely.  
184 Because of the remote nature, participants can be recruited anywhere in the United  
185 States, potentially allowing for a more diverse sample<sup>36</sup>. Additionally, participants will  
186 complete all aspects of the study from their home and will not have to come to any  
187 university or clinical site, therefore decreasing participant burden. Participants will be  
188 provided with instructional videos demonstrating the proper procedures for collecting at-  
189 home metrics, (e.g., blood pressure using a study-provided blood pressure cuff and at-  
190 home dried blood spot sample collection kits). Study staff will be available to offer  
191 additional assistance via email or video call, as needed. To maintain the study's focus  
192 on the transition to fatherhood, participants will be compassionately withdrawn from the  
193 study in the event of pregnancy loss, stillbirth, or other circumstances resulting in an  
194 unsuccessful completion of the pregnancy.

195

### 196 *Collection of Life's Essential 8 Cardiovascular Health Metrics*

197 In 2022, the American Heart Association released its new iteration of quantifying CVH –  
198 “Life's Essential 8”<sup>37</sup>. Life's Essential 8 consists of 4 modifiable health behaviors four  
199 behaviors (diet, physical activity, sleep health, and smoking) and four modifiable risk  
200 factors (body weight, blood lipids, blood glucose, and blood pressure). At each of the

201 four data collection time points, participants will complete assessments of each of the  
202 Life's Essential 8 metrics (see **Table 2**). Each metric is designed to take <5 minutes to  
203 assess, easing participant burden. To facilitate remote data collection, participants will  
204 be mailed study-provided equipment including a digital body weight scale and blood  
205 pressure cuff at the onset of the study. Furthermore, at-home dried blood spot sample  
206 collection kits will be mailed to participant's homes at each of the four assessment time  
207 points. Participants will be instructed to collect the sample while fasting (at least 8 hours  
208 since the prior meal) and will be encouraged to complete the sample collection at the  
209 same time of day for each of the four time points. Following the collection protocol,  
210 participants will seal their dried blood spot samples and return them for laboratory  
211 processing using the provided prepaid envelopes. Each metric will be scored on an  
212 ordinal point scoring scale of 0 to 100 points according to the American Heart  
213 Association scoring algorithm<sup>37</sup>. A higher score typically indicates better adherence to  
214 optimal health behaviors or risk factor management in that particular area. An overall  
215 CVH score will be calculated by summing the scores for each of the 8 metrics and  
216 dividing the total by 8, to provide a Life's Essential 8 score ranging from 0 to 100.

217

### 218 *Questionnaires and Other Assessment Measures*

219 The constructs, measures used, and time points at which questionnaire data collection  
220 will occur are outlined in **Table 3**. Some questionnaires are collected only once as they  
221 are relevant to only one phase of the study. Other measures are collected at multiple  
222 time points to observe change over time. Because the 1-month postpartum time point is

223 anticipated to be a more onerous time for participants, questionnaire data collection is  
224 intentionally limited.

225

### 226 *Participant Incentives*

227 Participants will be compensated for participation in the study at each timepoint with a  
228 \$40 gift card (up to \$160 total for completion of all timepoints). Compensation is one  
229 method being used to help maximize high retention rates throughout the study. As  
230 research volunteers, participants can stop taking part in the study at any point during  
231 the study period. In that scenario, participants will be compensated based on the study  
232 timepoints they have completed. Following the study's completion, participants will be  
233 allowed to keep the study-provided weight scale and blood pressure cuff.

234

### 235 *Data Management*

236 An electronic software program (RedCap software) will be used to enter and store data  
237 and will only be accessible to the authorized members of the research team<sup>38</sup>. All data  
238 will be stored in a de-identified format, with personal identifiers removed and replaced  
239 with unique study IDs to protect participant privacy.

240

### 241 *Sample Size*

242 Sample size was based on the power to detect the trend regression coefficient in  
243 simulation of the Generalized Estimating Equation model (Aim 2). The power to detect a  
244 non-null moderate trend effect (-0.05 points in CVH per month<sup>39</sup>) with a sample size of  
245 125 first-time fathers is 0.87 (see **Table 4**).

246

## 247 Statistical Analysis

248 For all analyses, baseline data will be described using standard descriptive statistics  
249 including frequency distributions, means and SDs, and medians and interquartile  
250 ranges. The primary outcome is change in Life's Essential 8 total score. Analysis plans  
251 specific to reach of the three research aims are described in detail below.

252

### 253 *Aim 1 Analysis*

254 Data will be split into training and testing sets with 80% of the sample allocated to  
255 training data and the remaining 20% left for testing data. Descriptive statistics of the  
256 baseline covariates (means and standard deviations) will be generated to check  
257 whether marginal distributions of predictive variables between training and test sets are  
258 relatively similar. Should this not be the case, we will regenerate the assignment of  
259 observations to the training set until distributions are similar. We will use XGBoost  
260 regression as the predictive algorithm with Mean Squared Error (MSE) as the primary  
261 loss function<sup>40</sup>. We select model parameters using grid search over the number of splits,  
262 training speed, observation subsampling rate, and feature sampling rate optimizing the  
263 5-fold cross-validation MSE. Once the final model parameters are chosen, we will train  
264 the model a final time using all of the training data, after which we will report the  
265 predictive metrics on the testing data

266 Once the final model is chosen, SHAP scores (Shapley Additive exPlanations) will be  
267 computed<sup>41</sup>. For each covariate, Mean Absolute SHAP will be computed to rank each  
268 predictor's importance toward predicting 1-year post-partum CVH. Among predictors

269 with a Mean Absolute SHAP >5 (meaning, on average, the predictor influences the final  
270 prediction at least 5 points on the Life's Essential 8 composite score), we will plot each  
271 observation SHAP versus the predictor value. This will give a more in-depth view of how  
272 predictor values influence model outputs. Mean absolute SHAP scores and plots will be  
273 reported and serve as hypothesis generation tools for future study of targeted  
274 interventions aimed at specific population subgroups of young adult men.

275

## 276 *Aim 2 Analysis*

277 Generalized Estimating Equations will be used to model the trajectory of Life's Essential  
278 8 composite score among first time fathers and will be based on the model described  
279 below. Let  $\mu_{ij}$  be the mean LE8 composite score of a participant  $i$  at observation  $j$ .

$$\mu_{ij} = \beta_0 + \beta_m m_{ij} + \vec{\gamma} \vec{Z}_{ij}$$

280 Where  $m_{ij}$  is the number of months to/since birth on observation  $j$  for participant  $i$ .  $Z_{ij}$  is  
281 the set of confounding predictors for CVH trajectories. We assume an AR (1) correlation  
282 structure between successive measurements on the same participant, under the  
283 assumption that CVH measurements taken closer together in time will be more  
284 correlated than those taken further apart. Based on the group trends observed, we will  
285 consider the use of interaction terms between  $m_{ij}$  and a grouping variable that can  
286 explain differences in trend.

287 There are 2 main parameters of interest:  $\beta_m$ : comparing two subpopulations of first-time  
288 fathers who are similar with respect to  $\vec{Z}$  and differing in time till/since birth by 1 month,  
289  $\beta_m$  is the mean difference in Life's Essential 8 composite score. Parameters will be

290 estimated using a GEE, and the corresponding estimates and 95% sandwich-based  
291 confidence intervals will be reported <sup>42</sup>.

292

### 293 *Aim 3 Analysis*

294 Throughout the study, we will collect data that can be analyzed to identify best practices  
295 for recruitment, retention, and remote data collection among first-time fathers for future  
296 research. After completing the fourth data collection timepoint, participants will be  
297 invited to complete a study feedback questionnaire<sup>43</sup>. Additionally, they will have the  
298 option to participate in an exit interview with a study coordinator to discuss their  
299 experiences in the study. These data will be reported with exploratory summary  
300 statistics.

301

### 302 *Missing Data*

303 We expect there to be missing data, which will naturally affect the inference in all 3  
304 aims. We will use information from staff feedback and participant study feedback  
305 questionnaire to inform the appropriate missingness paradigm. If it is reasonable to  
306 assume that missing observations are completely unrelated to cardiovascular health, we  
307 will proceed with a complete case analysis for all aims. If the missing observations are  
308 related to our observed quantities, we will implement a multiple imputation strategy and  
309 amend the inference (p-values, confidence intervals, mean absolute SHAP) to account  
310 for the uncertainty in the imputation procedure. If there is non-ignorable missingness,  
311 we will present our complete case results with an accompanying worst-case sensitivity  
312 analysis over reasonable ranges of what could have been observed.

313

## 314 **Discussion**

315 The Dad Bod Study is a prospective, longitudinal and observational study of young men  
316 who are prospective first-time fathers. Research during the perinatal period has  
317 predominantly focused on maternal and child health<sup>44,45</sup>, often overlooking the  
318 significant biological, social, and psychosocial changes that may be experienced by  
319 fathers (**Figure 1**). This bias has left a substantial gap in our understanding of paternal  
320 health during this transformative life stage. A better understanding of paternal CVH  
321 during the perinatal period is critical to meet new fathers' needs during this significant  
322 life transition. This understanding has implications for both paternal health and the  
323 overall wellbeing of the mother-father-infant triad<sup>11</sup>.

324

325 The Dad Bod Study brings several innovations in its study design and builds on prior  
326 studies examining the impact of fatherhood on men's health. This study's longitudinal  
327 design, spanning from mid-pregnancy through the first year of fatherhood, allows for a  
328 comprehensive assessment of CVH trajectories, capturing both acute and long-term  
329 changes associated with new paternal roles and responsibilities. By utilizing the  
330 American Heart Association's Life's Essential 8 metrics, the study provides a  
331 standardized and comprehensive evaluation of paternal CVH, encompassing both  
332 behavioral and biological factors. This is compared to other widely used risk  
333 assessment tools such as the Pooled Cohort ASCVD Risk Equations<sup>46</sup> or the more  
334 recent American Heart Association Predicting Risk of CVD EVENTS (PREVENT)  
335 equations<sup>47</sup>. However, while this study includes several objective metrics of CVH (e.g.,

336 dried blood spot for LDL cholesterol), several Life's Essential 8 metrics are collected  
337 from validated self-report measures (e.g., sleep via the Pittsburgh Sleep Quality). This  
338 was largely done for feasibility and cost; however, future studies could use objective  
339 measures when possible (e.g., accelerometer for measurement of physical activity and  
340 sleep). Another notable strength of the study lies in its utilization of comprehensive  
341 questionnaires to assess a wide range of social and psychosocial constructs. The data  
342 derived from these questionnaires are crucial, as they provide essential context for  
343 understanding the factors that influence the potential for improving or maintaining  
344 CVH<sup>37</sup>. Lastly, the study's remote data collection protocol was specifically designed to  
345 minimize participant burden by enabling fathers to complete all study components from  
346 their home environment. This approach acknowledges the time constraints often  
347 experienced by new fathers and may potentially enhance recruitment and retention  
348 rates, as well as data quality, by accommodating the participants' busy schedules and  
349 reducing logistical barriers to participation.

350

351 This study has limitations that also warrant discussion. First, participants may modify  
352 aspects of their behaviors in response to participation in the study (i.e., Hawthorne  
353 effect<sup>48</sup>), which may introduce bias into the collection of self-reported health metrics.  
354 Additionally, a potential limitation is participation bias, wherein individuals who are  
355 already health-conscious may be more likely to participate, potentially affecting the  
356 generalizability of the results. However, this study utilizes validated, widely used  
357 measures, which can account for some level of potential self-report bias.  
358 Generalizability may also be impacted by restricting the sample to English speakers<sup>49</sup>.



359 In Aim 1 we seek to build a machine learning predictive model for estimating 1-year  
360 post-partum CVH from baseline features. Sample size limitations likely inhibit building a  
361 truly generalizable model; however, it will be adequate for hypotheses generation for  
362 discriminating features of first-time fathers who will decline in CVH. In Aim 2, as our  
363 sample is purely composed of first-time fathers, it is difficult to discriminate with  
364 precision whether the change in CVH health among first time fathers is due to the effect  
365 of simply aging, or whether the birth of their first child resulted in some accelerative  
366 effect on CVH. While this study provides critical preliminary data on the transition to  
367 fatherhood, in a subsequent study, it would be useful to recruit both first-time fathers  
368 and age-matched non-expecting men and follow them over similar amounts of time.  
369 Following baseline data collection, this study requires follow-up at three postpartum  
370 timepoints. While data collection strategies that minimize participant burden are used,  
371 there may be incomplete data among men who are lost to follow-up. Multiple reminder  
372 strategies and participant incentives will be implemented across the duration of the  
373 study to minimize potential participant attrition. Due to the remote data collection  
374 methods<sup>50</sup>, which decrease participant burden, anticipated participant attrition is  
375 expected to be low. Any additional challenges to recruitment and retention (Aim 3) will  
376 provide important learning opportunities that would strengthen a future study's design  
377 and execution.

378

### 379 **Summary**

380 This prospective, longitudinal and observational study represents a novel examination  
381 of CVH among first-time fathers and how CVH may change as young men face new

382 roles and responsibilities associated with fatherhood. The identification of specific  
383 factors that are predictive of CVH allow for hypotheses generation of discriminating  
384 features of first-time fathers who will decline in CVH. This in turn could set the stage for  
385 public health interventions and clinical applications targeted towards these factors.  
386 Additionally, outcomes provide novel insights into CVH behaviors and risk factors that  
387 would be most critical to monitor, preserve, and improve among young men.

388 **Acknowledgments**

389 None

390

391 **Sources of Funding**

392 This work was supported by the American Heart Association Career Development  
393 Award (<https://doi.org/10.58275/AHA.24CDA1258755.pc.gr.193626>). The development  
394 of this project was supported by the National Center for Research Resources and the  
395 National Center for Advancing Translational Sciences, National Institutes of Health,  
396 through Grants UL1 TR001414 and 1UM1TR004927. Partial funding for publishing this  
397 article open access was provided by the University of California Libraries under a  
398 transformative open access agreement with the publisher.

399

400 **Competing Interests Disclosure**

401 The authors declare that they have no competing interests.

402

403 **Author Contributions**

404 MJL drafted the manuscript. All authors read and approved the final manuscript.

405

406 **Data Sharing**

407 Data sharing is not applicable to this article as no datasets were generated or analyzed.

408 After study completion, the anonymized data and material will be made publicly  
409 available.

410

| <b>Table 1. Inclusion and Exclusion Criteria</b>                                                                                                                                                                                                                                                                                                                                                                                                                                                                                                                                                                                                                                                                    |
|---------------------------------------------------------------------------------------------------------------------------------------------------------------------------------------------------------------------------------------------------------------------------------------------------------------------------------------------------------------------------------------------------------------------------------------------------------------------------------------------------------------------------------------------------------------------------------------------------------------------------------------------------------------------------------------------------------------------|
| <p><b>Inclusion Criteria</b></p> <ol style="list-style-type: none"><li>1. Self-identity as male</li><li>2. Age <math>\geq 19</math> and <math>\leq 39</math> years</li><li>3. First-time biological father</li><li>4. Ability to read written English</li><li>5. Generally healthy (no confirmed diagnosis of a chronic disease (e.g., coronary heart disease, type 2 diabetes, chronic kidney disease))</li><li>6. Willing to participate in study data collection and assessment outlined in the study protocol over a period of about 1.5 years (baseline to 12-month follow-up after child's birth)</li><li>7. Signed written informed consent</li></ol>                                                        |
| <p><b>Exclusion Criteria</b></p> <ol style="list-style-type: none"><li>1. Age <math>\leq 18</math> or <math>\geq 40</math> years</li><li>2. Biological father of a prior child</li><li>3. Currently under psychiatric care or taking psychiatric medications</li><li>4. Prior history of disordered eating or severe body dysmorphia that may preclude being able to recall dietary intake or provide accurate measurements of their body weight from an electronic scale</li><li>5. Residing outside the United States or has anticipated plans to move outside of the United States within the next year</li><li>6. Enrolled in another competing investigational study, as per investigator discretion</li></ol> |

411

412

| <b>Table 2. Life’s Essential 8 Metrics and Method of Measurement<sup>a</sup></b>                                                                                                                                                        |                                                                                                                                                                                                                     |
|-----------------------------------------------------------------------------------------------------------------------------------------------------------------------------------------------------------------------------------------|---------------------------------------------------------------------------------------------------------------------------------------------------------------------------------------------------------------------|
| <b>Metric</b>                                                                                                                                                                                                                           | <b>Method of Measurement</b>                                                                                                                                                                                        |
| 1.Diet                                                                                                                                                                                                                                  | Self-administrated dietary recall using diet quality photo navigation (DietID) <sup>51-53</sup> , from which a Healthy Eating Index-2020 <sup>54</sup> (HEI-2020) score will be calculated.                         |
| 2.Physical Activity                                                                                                                                                                                                                     | Self-reported minutes of moderate or vigorous physical activity via International Physical Activity Questionnaire (IPAQ) <sup>55</sup> .                                                                            |
| 3.Nicotine Exposure                                                                                                                                                                                                                     | Self-reported use of cigarettes or products containing nicotine via Behavioral Risk Factor Surveillance System Tobacco Use core questions <sup>56</sup> .                                                           |
| 4.Sleep Health                                                                                                                                                                                                                          | Self-reported average hours of sleep per night via Pittsburgh Sleep Quality Index (PSQI) item <sup>57</sup> .                                                                                                       |
| 5.Body Mass Index (BMI)                                                                                                                                                                                                                 | Objective measurement of weight from study-provided scale (Tanita HS-302 Light Powered Digital Scale) and self-reported height. BMI calculated as kg/m <sup>2</sup> .                                               |
| 6.Blood Lipids                                                                                                                                                                                                                          | Objective measurement of plasma total and HDL-cholesterol with calculation of non-HDL-cholesterol and fasting blood glucose from at-home dried blood spot sample collection <sup>58</sup> (Molecular Testing Labs). |
| 7.Blood Glucose                                                                                                                                                                                                                         |                                                                                                                                                                                                                     |
| 8.Blood Pressure                                                                                                                                                                                                                        | Objective measurement of systolic and diastolic blood pressure from study-provided blood pressure cuff (Omron Bronze Upper Arm Monitor).                                                                            |
| <sup>a</sup> All eight metrics will be collected at four assessment time points: BL: baseline (during the pregnant partner’s 2 <sup>nd</sup> trimester); 1M: 1-month postpartum; 6M: 6-months postpartum; and 12M: 12-month postpartum) |                                                                                                                                                                                                                     |

413

414

| <b>Table 2. Dad Bod Study Questionnaire Constructs, Measures, and Assessment Schedule</b>                                                                                                        |                                                                                                                                                                                                                                                               |                          |    |    |     |
|--------------------------------------------------------------------------------------------------------------------------------------------------------------------------------------------------|---------------------------------------------------------------------------------------------------------------------------------------------------------------------------------------------------------------------------------------------------------------|--------------------------|----|----|-----|
| Construct                                                                                                                                                                                        | Measure                                                                                                                                                                                                                                                       | Time Points <sup>a</sup> |    |    |     |
|                                                                                                                                                                                                  |                                                                                                                                                                                                                                                               | BL                       | 1M | 6M | 12M |
| <i>Individual and Interpersonal Factors</i>                                                                                                                                                      |                                                                                                                                                                                                                                                               |                          |    |    |     |
| Demographics                                                                                                                                                                                     | Race and ethnicity <sup>59</sup> , health insurance <sup>56</sup> , marital status <sup>56</sup> , educational attainment <sup>56</sup> , employment status <sup>56</sup> , household income <sup>56</sup> , individuals within the household <sup>56</sup> . | ♂                        |    | ♂  | ♂   |
| Neighborhood Characteristics                                                                                                                                                                     | Area Deprivation Index (ADI) <sup>60</sup>                                                                                                                                                                                                                    | ♂                        |    | ♂  | ♂   |
| Food Security                                                                                                                                                                                    | U.S Household Food Security Survey Module: Six-Item Short Form Security Scale <sup>61</sup>                                                                                                                                                                   | ♂                        |    | ♂  | ♂   |
| Other Pillars of Food Security                                                                                                                                                                   | Center for Nutrition & Health Impact-developed measure (includes availability, utilization and stability) <sup>62</sup>                                                                                                                                       | ♂                        |    | ♂  | ♂   |
| Household Resilience                                                                                                                                                                             | Center for Nutrition & Health Impact-developed measure (includes absorptive capacity, adaptive capacity, and transformative capacity) <sup>63</sup>                                                                                                           | ♂                        |    | ♂  | ♂   |
| Nutrition Security                                                                                                                                                                               | Center for Nutrition & Health Impact-developed measure (includes nutrition security, healthfulness choice, and dietary choice) <sup>64</sup>                                                                                                                  | ♂                        |    | ♂  | ♂   |
| Substance Use                                                                                                                                                                                    | Alcohol (abbreviated from the National Epidemiologic Survey on Alcohol and Related Conditions and the Alcohol Use Disorders Identification Test (AUDIT)) <sup>65,66</sup>                                                                                     | ♂                        |    | ♂  | ♂   |
|                                                                                                                                                                                                  | Cannabis (abbreviated National Institute on Drug Abuse (NIDA) Quick Screen V1.0) <sup>67</sup>                                                                                                                                                                | ♂                        |    | ♂  | ♂   |
|                                                                                                                                                                                                  | Vaping (abbreviated Population Assessment of Tobacco and Health (PATH) questionnaire) <sup>68</sup>                                                                                                                                                           | ♂                        |    | ♂  | ♂   |
| <i>Psychosocial Factors</i>                                                                                                                                                                      |                                                                                                                                                                                                                                                               |                          |    |    |     |
| Self-Esteem                                                                                                                                                                                      | Rosenberg Self-Esteem Scale <sup>69</sup>                                                                                                                                                                                                                     | ♂                        |    | ♂  | ♂   |
| Well-Being (Affect)                                                                                                                                                                              | Bradburn Scale of Psychological Well-Being <sup>70</sup>                                                                                                                                                                                                      | ♂                        |    | ♂  | ♂   |
| Stress                                                                                                                                                                                           | Perceived Stress Scale (PSS-10) <sup>71</sup>                                                                                                                                                                                                                 | ♂                        |    | ♂  | ♂   |
| Social Support                                                                                                                                                                                   | Duke-UNC Functional Social Support Questionnaire <sup>72</sup>                                                                                                                                                                                                | ♂                        |    | ♂  | ♂   |
| <i>Social and Psychosocial Factors Relevant to the Transition to Fatherhood</i>                                                                                                                  |                                                                                                                                                                                                                                                               |                          |    |    |     |
| Paternal Adaptation                                                                                                                                                                              | Paternal Adaptation Questionnaire <sup>73</sup>                                                                                                                                                                                                               |                          |    | ♂  |     |
| Depression                                                                                                                                                                                       | Edinburgh Postnatal Depression Scale (EPDS) <sup>74</sup>                                                                                                                                                                                                     |                          | ♂  | ♂  | ♂   |
| Experiences of First Childbirth                                                                                                                                                                  | Father's Experiences of First Childbirth (FTFQ) <sup>75</sup>                                                                                                                                                                                                 |                          | ♂  |    |     |
| Involvement of Care                                                                                                                                                                              | Baby Care Scale – Antenatal <sup>76</sup>                                                                                                                                                                                                                     | ♂                        |    |    |     |
|                                                                                                                                                                                                  | Baby Care Scale – Postnatal <sup>76</sup>                                                                                                                                                                                                                     |                          |    | ♂  |     |
| Attachment                                                                                                                                                                                       | Paternal Antenatal Attachment Scale <sup>77</sup>                                                                                                                                                                                                             | ♂                        |    |    |     |
| Parenting Practices                                                                                                                                                                              | Baby Care Questionnaires (BCQ) <sup>78</sup>                                                                                                                                                                                                                  |                          |    | ♂  | ♂   |
| <sup>a</sup> Four assessment time points: BL: baseline (during the pregnant partner's 2 <sup>nd</sup> trimester); 1M: 1-month postpartum; 6M: 6-months postpartum; and 12M: 12-month postpartum) |                                                                                                                                                                                                                                                               |                          |    |    |     |

415

416

|                                                                                                                       |
|-----------------------------------------------------------------------------------------------------------------------|
| <b>Table 4. Power to Detect a Non-Null Trend Effect for Various Sample Size and Proposed Interaction Effect Sizes</b> |
|-----------------------------------------------------------------------------------------------------------------------|

It is made available under a [CC-BY-NC 4.0 International license](#) .

| Effect Size | N =100 | N =125 | N =150 |
|-------------|--------|--------|--------|
| -0.1        | 0.99   | 1      | 0.999  |
| -0.05       | 0.769  | 0.867  | 0.924  |
| -0.01       | 0.279  | 0.306  | 0.390  |

417

418

## Biopsychosocial Model of Emergent Father's Health

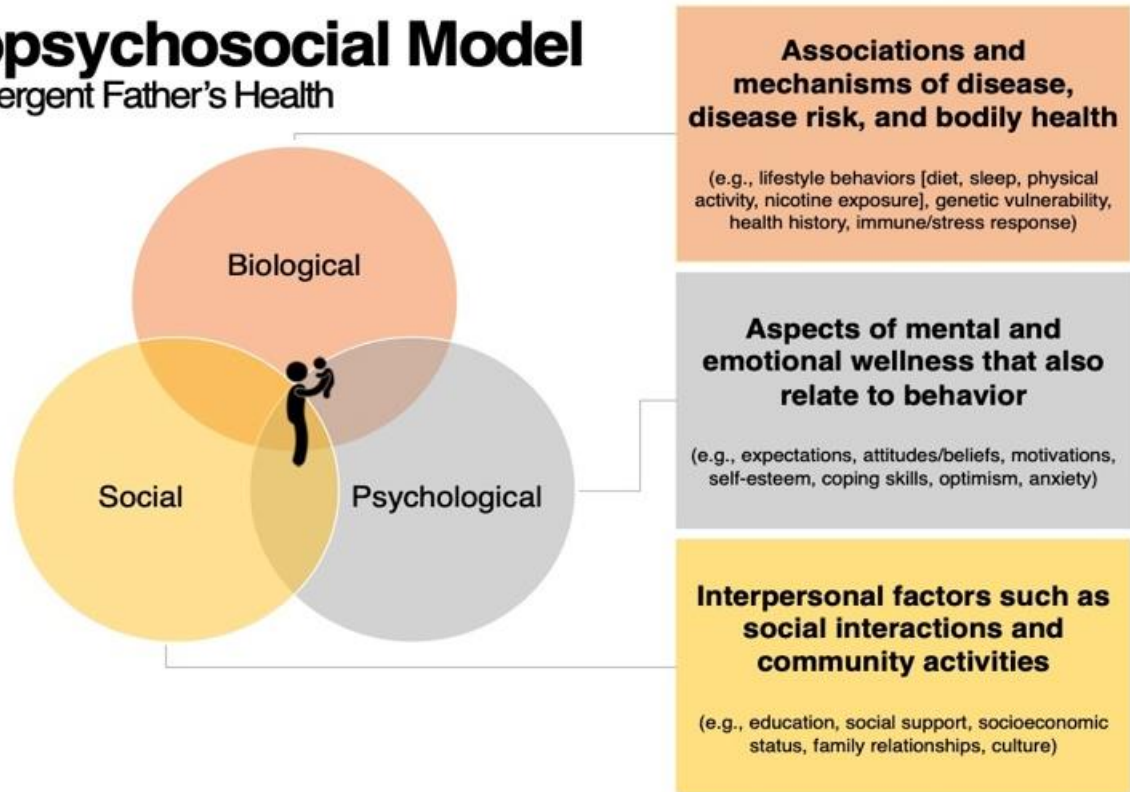

419

420

421 **Figure 1.** Biopsychosocial Model of the overlapping interplay of biological,

422 psychological, and social factors that may impact emergent father's health.



423 **References**

- 424 1. Ioachimescu OC. From Seven Sweethearts to Life Begins at Eight Thirty: A  
425 Journey From Life's Simple 7 to Life's Essential 8 and Beyond. *J Am Heart*  
426 *Assoc.* 2022;11:e027658.
- 427 2. Martin SS, Aday AW, Almarzooq ZI, Anderson CA, Arora P, Avery CL, Baker-  
428 Smith CM, Barone Gibbs B, Beaton AZ, Boehme AK. 2024 Heart Disease and  
429 Stroke Statistics: A Report of US and Global Data From the American Heart  
430 Association. *Circulation.* 2024;149:e347-e913.
- 431 3. Gooding HC, Shay CM, Ning H, Gillman MW, Chiuve SE, Reis JP, Allen NB,  
432 Lloyd-Jones DM. Optimal lifestyle components in young adulthood are  
433 associated with maintaining the ideal cardiovascular health profile into middle  
434 age. *J Am Heart Assoc.* 2015;4:e002048.
- 435 4. Liu K, Daviglius ML, Loria CM, Colangelo LA, Spring B, Moller AC, Lloyd-Jones  
436 DM. Healthy lifestyle through young adulthood and the presence of low  
437 cardiovascular disease risk profile in middle age: the Coronary Artery Risk  
438 Development in (Young) Adults (CARDIA) study. *Circulation.* 2012;125:996-1004.
- 439 5. Spring B, Moller AC, Colangelo LA, Siddique J, Roehrig M, Daviglius ML, Polak  
440 JF, Reis JP, Sidney S, Liu K. Healthy lifestyle change and subclinical  
441 atherosclerosis in young adults: Coronary Artery Risk Development in Young  
442 Adults (CARDIA) study. *Circulation.* 2014;130:10-17.
- 443 6. Arnett JJ. Emerging adulthood: A theory of development from the late teens  
444 through the twenties. *Am Psychol.* 2000;55:469.
- 445 7. Andersson C, Vasani RS. Epidemiology of cardiovascular disease in young  
446 individuals. *Nat Rev Cardiol.* 2018;15:230-240. doi: 10.1038/nrcardio.2017.154

- 447 8. Shetty NS, Parcha V, Patel N, Yadav I, Basetty C, Li C, Pandey A, Kalra R, Li P,  
448 Arora G. AHA Life's essential 8 and ideal cardiovascular health among young  
449 adults. *Am J Prev Cardiology*. 2023;13:100452.
- 450 9. Borrell-Carrió F, Suchman AL, Epstein RM. The biopsychosocial model 25 years  
451 later: principles, practice, and scientific inquiry. *The Annals of Family Medicine*.  
452 2004;2:576-582.
- 453 10. Garfield CF. Supporting fatherhood before and after it happens. *Pediatrics*.  
454 2015;135:e528-e530.
- 455 11. Garfield CF, Clark-Kauffman E, Davis MM. Fatherhood as a component of men's  
456 health. *JAMA*. 2006;296:2365-2368.
- 457 12. Yogman M, Garfield CF, Bauer NS, Gambon TB, Lavin A, Lemmon KM, Mattson  
458 G, Rafferty JR, Wissow LS, Child CoPAo, et al. Fathers' roles in the care and  
459 development of their children: The role of pediatricians. *Pediatrics*. 2016;138.
- 460 13. Churchwell K, Elkind MS, Benjamin RM, Carson AP, Chang EK, Lawrence W,  
461 Mills A, Odom TM, Rodriguez CJ, Rodriguez F. Call to action: structural racism as  
462 a fundamental driver of health disparities: a presidential advisory from the  
463 American Heart Association. *Circulation*. 2020;142:e454-e468.
- 464 14. Bell CN, Thorpe Jr RJ, Bowie JV, LaVeist TA. Race disparities in cardiovascular  
465 disease risk factors within socioeconomic status strata. *Ann Epidemiol*.  
466 2018;28:147-152.
- 467 15. Whitaker KM, Jacobs Jr DR, Kershaw KN, Demmer RT, Booth III JN, Carson AP,  
468 Lewis CE, Goff Jr DC, Lloyd-Jones DM, Gordon-Larsen P. Racial disparities in

- 469 cardiovascular health behaviors: the coronary artery risk development in young  
470 adults study. *Am J Prev Med*. 2018;55:63-71.
- 471 16. Chhabra J, McDermott B, Li W. Risk factors for paternal perinatal depression and  
472 anxiety: A systematic review and meta-analysis. *Psychology of Men &*  
473 *Masculinities*. 2020;21:593.
- 474 17. Garfield CF, Duncan G, Rutsohn J, McDade TW, Adam EK, Coley RL, Chase-  
475 Lansdale PL. A longitudinal study of paternal mental health during transition to  
476 fatherhood as young adults. *Pediatrics*. 2014;133:836-843.
- 477 18. Corder K, Winpenny EM, Foubister C, Guagliano JM, Hartwig XM, Love R,  
478 Clifford Astbury C, van Sluijs EMF. Becoming a parent: A systematic review and  
479 meta-analysis of changes in BMI, diet, and physical activity. *Obes Rev*.  
480 2020;21:e12959. doi: 10.1111/obr.12959
- 481 19. Neshteruk CD, Norman K, Armstrong SC, Cholera R, D'Agostino E, Skinner AC.  
482 Association between parenthood and cardiovascular disease risk: Analysis from  
483 NHANES 2011-2016. *Prev Med Rep*. 2022;27:101820. doi:  
484 10.1016/j.pmedr.2022.101820
- 485 20. Whooten RC, Kotelchuck M, Gonzalez AVC, Johnson N, Kwete G, Luo M, Muir  
486 HF, Barth EA, Smith N, Taveras EM. Expectant fathers' health behaviors, infant  
487 care intentions, and social-emotional wellbeing in the perinatal period: A latent  
488 class analysis and comparison to mothers. *Prev Med Rep*. 2023;36:102375.
- 489 21. Wynter K, Francis LM, Fletcher R, McBride N, Dowse E, Wilson N, Di Manno L,  
490 Teague S, Macdonald JA, Consortium AFR. Sleep, mental health and wellbeing

- 491 among fathers of infants up to one year postpartum: A scoping review. *Midwifery*.  
492 2020;88:102738.
- 493 22. Lo BK, Kang AW, Haneuse S, Yu X, Ash Tv, Redline S, Taveras EM, Davison KK.  
494 Changes in Fathers' Body Mass Index, Sleep, and Diet From Prebirth to 12  
495 Months Postbirth: Exploring the Moderating Roles of Parenthood Experience and  
496 Coparenting Support. *Ann Behav Med*. 2021;55:1211-1219.
- 497 23. Versele V, Stok FM, Aerenhouts D, Deforche B, Bogaerts A, Devlieger R, Clarys  
498 P, Deliens T. Determinants of changes in women's and men's eating behavior  
499 across the transition to parenthood: A focus group study. *Int J Behav Nutr Phys*  
500 *Act*. 2021;18:1-18.
- 501 24. Garfield CF, Duncan G, Gutina A, Rutsohn J, McDade TW, Adam EK, Coley RL,  
502 Chase-Lansdale PL. Longitudinal Study of Body Mass Index in Young Males and  
503 the Transition to Fatherhood. *Am J Mens Health*. 2016;10:Np158-np167. doi:  
504 10.1177/1557988315596224
- 505 25. Versele V, Stas L, Aerenhouts D, Deliens T, Clarys P, Gucciardo L, Bogaerts A,  
506 Devlieger R. Changes in maternal and paternal body composition during the  
507 transition to parenthood (TRANSPARENTS). *Obesity (Silver Spring)*.  
508 2023;31:225-233.
- 509 26. Saxbe D, Corner GW, Khaled M, Horton K, Wu B, Khoddam HL. The weight of  
510 fatherhood: identifying mechanisms to explain paternal perinatal weight gain.  
511 *Health Psychol Rev*. 2018;12:294-311. doi: 10.1080/17437199.2018.1463166

- 512 27. Brown DM, Abrams B, Cohen AK, Rehkopf DH. Motherhood, fatherhood and  
513 midlife weight gain in a US cohort: Associations differ by race/ethnicity and  
514 socioeconomic position. *SSM-population health*. 2017;3:558-565.
- 515 28. Parker JJF, Garfield CF, Simon CD, Colangelo LA, Bancks MP, Allen NB.  
516 Fatherhood and Cardiovascular Health, Disease, and Mortality: Associations  
517 From the Multi-Ethnic Study of Atherosclerosis. *AJPM focus*. 2024;3:100231.
- 518 29. Joosten YA, Israel TL, Head A, Vaughn Y, Villalta Gil V, Mouton C, Wilkins CH.  
519 Enhancing translational researchers' ability to collaborate with community  
520 stakeholders: Lessons from the Community Engagement Studio. *J Clin Transl  
521 Sci*. 2018;2:201-207. doi: 10.1017/cts.2018.323
- 522 30. Joosten YA, Israel TL, Williams NA, Boone LR, Schlundt DG, Mouton CP, Dittus  
523 RS, Bernard GR, Wilkins CH. Community Engagement Studios: A Structured  
524 Approach to Obtaining Meaningful Input From Stakeholders to Inform Research.  
525 *Acad Med*. 2015;90:1646-1650. doi: 10.1097/acm.0000000000000794
- 526 31. Borg DJ, Haritopoulou-Sinanidou M, Gabrovska P, Tseng H-W, Honeyman D,  
527 Schweitzer D, Rae KM. Barriers and facilitators for recruiting and retaining male  
528 participants into longitudinal health research: a systematic review. *BMC Med Res  
529 Methodol*. 2024;24:46.
- 530 32. Chandler S, Field PA. Becoming a father: First-time fathers' experience of labor  
531 and delivery. *J Nurse Midwifery*. 1997;42:17-24.
- 532 33. Native Health Research. Ads For Clinical Research Recruitment.  
533 <https://www.healthresearch.study/>. 2024. Accessed August 22.

- 534 34. Gooding HC, Gidding SS, Moran AE, Redmond N, Allen NB, Bacha F, Burns TL,  
535 Catov JM, Grandner MA, Harris KM. Challenges and opportunities for the  
536 prevention and treatment of cardiovascular disease among young adults: report  
537 from a National Heart, Lung, and Blood Institute Working Group. *J Am Heart*  
538 *Assoc.* 2020;9:e016115.
- 539 35. Mursa R, Patterson C, Halcomb E. Men's help-seeking and engagement with  
540 general practice: An integrative review. *J Adv Nurs.* 2022;78:1938-1953.
- 541 36. Stewart J, Krows ML, Schaafsma TT, Heller KB, Brown ER, Boonyaratankornkit  
542 J, Brown CE, Leingang H, Liou C, Bershteyn A. Comparison of racial, ethnic, and  
543 geographic location diversity of participants enrolled in clinic-based vs 2 remote  
544 COVID-19 clinical trials. *JAMA Netw Open.* 2022;5:e2148325-e2148325.
- 545 37. Lloyd-Jones DM, Allen NB, Anderson CA, Black T, Brewer LC, Foraker RE,  
546 Grandner MA, Lavretsky H, Perak AM, Sharma G. Life's Essential 8: Updating  
547 and Enhancing the American Heart Association's Construct of Cardiovascular  
548 Health: A Presidential Advisory From the American Heart Association. *Circulation.*  
549 2022;146:e18-e43.
- 550 38. Harris PA, Taylor R, Thielke R, Payne J, Gonzalez N, Conde JG. Research  
551 electronic data capture (REDCap)—a metadata-driven methodology and  
552 workflow process for providing translational research informatics support. *J*  
553 *Biomed Inform.* 2009;42:377-381.
- 554 39. Li C, Li Y, Zhao M, Zhang C, Bovet P, Xi B. Using the New “Life's Essential 8”  
555 Metrics to Evaluate Trends in Cardiovascular Health Among US Adults From

- 556 2005 to 2018: Analysis of Serial Cross-sectional Studies. *JMIR Public Health and*  
557 *Surveillance*. 2023;9:e45521.
- 558 40. Chen T, Guestrin C. Xgboost: A scalable tree boosting system. Paper/Poster  
559 presented at: Proceedings of the 22nd acm sigkdd international conference on  
560 knowledge discovery and data mining; 2016;
- 561 41. Lundberg SM, Lee S-I. A unified approach to interpreting model predictions. *Adv*  
562 *Neural Inf Process Syst*. 2017;30.
- 563 42. Schober P, Vetter TR. Repeated measures designs and analysis of longitudinal  
564 data: If at first you do not succeed—try, try again. *Anesth Analg*. 2018;127:569.
- 565 43. Yessis JL, Kost RG, Lee LM, Coller BS, Henderson DK. Development of a  
566 research participants' perception survey to improve clinical research. *Clin Transl*  
567 *Sci*. 2012;5:452-460. doi: 10.1111/j.1752-8062.2012.00443.x
- 568 44. Kotelchuck M, Lu M. Father's role in preconception health. *Matern Child Health J*.  
569 2017;21:2025-2039.
- 570 45. Hodgson S, Painter J, Kilby L, Hirst J. The experiences of first-time fathers in  
571 perinatal services: Present but invisible. Paper/Poster presented at: Healthcare;  
572 2021;
- 573 46. Goff Jr DC, Lloyd-Jones DM, Bennett G, Coady S, D'agostino RB, Gibbons R,  
574 Greenland P, Lackland DT, Levy D, O'donnell CJ. 2013 ACC/AHA guideline on  
575 the assessment of cardiovascular risk: a report of the American College of  
576 Cardiology/American Heart Association Task Force on Practice Guidelines.  
577 *Circulation*. 2014;129:S49-S73.

- 578 47. Khan SS, Matsushita K, Sang Y, Ballew SH, Grams ME, Surapaneni A, Blaha  
579 MJ, Carson AP, Chang AR, Ciemins E, et al. Development and Validation of the  
580 American Heart Association's PREVENT Equations. *Circulation*. 2024;149:430-  
581 449. doi: 10.1161/circulationaha.123.067626
- 582 48. Sedgwick P, Greenwood N. Understanding the Hawthorne effect. *BMJ*. 2015;351.
- 583 49. Muthukumar AV, Morrell W, Bierer BE. Evaluating the frequency of English  
584 language requirements in clinical trial eligibility criteria: A systematic analysis  
585 using ClinicalTrials.gov. *PLoS Med*. 2021;18:e1003758. doi:  
586 10.1371/journal.pmed.1003758
- 587 50. Hensen B, Mackworth-Young C, Simwinga M, Abdelmagid N, Banda J, Mavodza  
588 C, Doyle A, Bonell C, Weiss H. Remote data collection for public health research  
589 in a COVID-19 era: ethical implications, challenges and opportunities. *Health  
590 Policy Plan*. 2021;36:360-368.
- 591 51. Turner-McGrievy G, Hutto B, Bernhart JA, Wilson MJ. Comparison of the diet ID  
592 platform to the automated self-administered 24-hour (ASA24) dietary assessment  
593 tool for assessment of dietary intake. *J Am Nutr Assoc*. 2022;41:360-382.
- 594 52. Dansinger ML, Breton GL, Joly JE, Rhee LQ, Katz DL. Rapid, digital dietary  
595 assessment in association with cardiometabolic biomarkers. *Am J Health  
596 Promot*. 2023:08901171231156513.
- 597 53. Bernstein AM, Rhee LQ, Njike VY, Katz DL. Dietary Assessment by Pattern  
598 Recognition: a comparative analysis. *Curr Dev Nutr*. 2023;7:101999.
- 599 54. Shams-White MM, Pannucci TE, Lerman JL, Herrick KA, Zimmer M, Mathieu KM,  
600 Stoody EE, Reedy J. Healthy Eating Index-2020: Review and Update Process to



- 601 Reflect the Dietary Guidelines for Americans, 2020-2025. *J Acad Nutr Diet*.  
602 2023;123:1280-1288.
- 603 55. Craig CL, Marshall AL, Sjöström M, Bauman AE, Booth ML, Ainsworth BE, Pratt  
604 M, Ekelund U, Yngve A, Sallis JF, et al. International physical activity  
605 questionnaire: 12-country reliability and validity. *Med Sci Sports Exerc*.  
606 2003;35:1381-1395. doi: 10.1249/01.Mss.0000078924.61453.Fb
- 607 56. Centers for Disease Control and Prevention (CDC) [database online]. Atlanta,  
608 GA: U.S. Department of Health and Human Services, Centers for Disease  
609 Control and Prevention; 2022.
- 610 57. Buysse DJ, Reynolds III CF, Monk TH, Berman SR, Kupfer DJ. The Pittsburgh  
611 Sleep Quality Index: a new instrument for psychiatric practice and research.  
612 *Psychiatry Res*. 1989;28:193-213.
- 613 58. Kapur S, Kapur S, Zava D. Cardiometabolic risk factors assessed by a finger  
614 stick dried blood spot method. *J Diabetes Sci Technol*. 2008;2:236-241.
- 615 59. Mathews K, Phelan J, Jones NA, Konya S, Marks R, Pratt BM, Coombs J,  
616 Bentley M. National Content Test: Race and ethnicity analysis report. *US*  
617 *Department of Commerce, Economics and Statistics Administration, US Census*  
618 *Bureau*. 2015.
- 619 60. Kind AJ, Buckingham WR. Making neighborhood-disadvantage metrics  
620 accessible—the neighborhood atlas. *The New England journal of medicine*.  
621 2018;378:2456.

- 622 61. Blumberg SJ, Bialostosky K, Hamilton WL, Briefel RR. The effectiveness of a  
623 short form of the Household Food Security Scale. *Am J Public Health*.  
624 1999;89:1231-1234. doi: 10.2105/ajph.89.8.1231
- 625 62. Calloway EE, Carpenter LR, Gargano T, Sharp JL, Yaroch AL. New measures to  
626 assess the “Other” three pillars of food security—availability, utilization, and  
627 stability. *Int J Behav Nutr Phys Act*. 2023;20:51.
- 628 63. Calloway EE, Carpenter LR, Gargano T, Sharp JL, Yaroch AL. Development of  
629 three new multidimensional measures to assess household food insecurity  
630 resilience in the United States. *Front Public Health*. 2022;10:1048501.
- 631 64. Calloway EE, Carpenter LR, Gargano T, Sharp JL, Yaroch AL. Development of  
632 new measures to assess household nutrition security, and choice in dietary  
633 characteristics. *Appetite*. 2022;179:106288.
- 634 65. Grant BF, Dawson DA. Introduction to the national epidemiologic survey on  
635 alcohol and related conditions. *Alcohol Research & Health*. 2006;29:74.
- 636 66. Bradley KA, Bush KR, Epler AJ, Dobie DJ, Davis TM, Sporleder JL, Maynard C,  
637 Burman ML, Kivlahan DR. Two brief alcohol-screening tests From the Alcohol  
638 Use Disorders Identification Test (AUDIT): validation in a female Veterans Affairs  
639 patient population. *Arch Intern Med*. 2003;163:821-829.
- 640 67. The Alcohol, Smoking and Substance Involvement Screening Test (ASSIST):  
641 development, reliability and feasibility. *Addiction*. 2002;97:1183-1194. doi:  
642 10.1046/j.1360-0443.2002.00185.x
- 643 68. Hyland A, Ambrose BK, Conway KP, Borek N, Lambert E, Carusi C, Taylor K,  
644 Crosse S, Fong GT, Cummings KM. Design and methods of the Population

- 645            Assessment of Tobacco and Health (PATH) Study. *Tobacco control*. 2017;26:371-  
646            378.
- 647    69.    Rosenberg M. Rosenberg self-esteem scale. *Journal of Religion and Health*.  
648            1965.
- 649    70.    McDOWELL I, Praught E. On the measurement of happiness: an examination of  
650            the Bradburn Scale in the Canada Health Survey. *Am J Epidemiol*. 1982;116:949-  
651            958.
- 652    71.    Cohen S, Kamarck T, Mermelstein R. A global measure of perceived stress. *J*  
653            *Health Soc Behav*. 1983:385-396.
- 654    72.    Broadhead W, Gehlbach SH, De Gruy FV, Kaplan BH. The Duke-UNC Functional  
655            Social Support Questionnaire: Measurement of social support in family medicine  
656            patients. *Med Care*. 1988:709-723.
- 657    73.    Eskandari N, Simbar M, Vadadhir A, Baghestani AR. Design and evaluation of  
658            the psychometric properties of a paternal adaptation questionnaire. *Am J Mens*  
659            *Health*. 2018;12:2018-2028.
- 660    74.    Cox JL, Holden JM, Sagovsky R. Detection of postnatal depression:  
661            development of the 10-item Edinburgh Postnatal Depression Scale. *Br J*  
662            *Psychiatry*. 1987;150:782-786.
- 663    75.    Premberg Å, Taft C, Hellström A-L, Berg M. Father for the first time-development  
664            and validation of a questionnaire to assess fathers' experiences of first childbirth  
665            (FTFQ). *BMC Pregnancy Childbirth*. 2012;12:1-9.

- 666 76. Pinto TM, Nunes-Costa R, Figueiredo B. The Baby Care Scale: A psychometric  
667 study with fathers during pregnancy and the postpartum period. *Front Psychol.*  
668 2021;12.
- 669 77. Condon JT. The assessment of antenatal emotional attachment: development of  
670 a questionnaire instrument. *Br J Med Psychol.* 1993;66:167-183.
- 671 78. Winstanley A, Gattis M. The Baby Care Questionnaire: A measure of parenting  
672 principles and practices during infancy. *Infant Behav Dev.* 2013;36:762-775.  
673
